# Supplementary material
Source: HighWire-hosted journal article supplement (https://emj.bmj.com/content/emermed-2023-213483)
Supplement: inline-supplementary-material-1 [file inline-supplementary-material-1.pdf]

## 1. MEDLINE

### MeSH: Bacterial Infections

#### **Bacterial Infections**

##### Bacteremia

[Hemorrhagic Septicemia](#)

[Bacterial Zoonoses](#)

[Central Nervous System Bacterial Infections](#)

[Lyme Neuroborreliosis](#)

Meningitis, Bacterial +

[Neurosyphilis +](#)

[Tuberculosis, Central Nervous System +](#)

[Endocarditis, Bacterial](#)

[Endocarditis, Subacute Bacterial](#)

[Eye Infections, Bacterial](#)

[Conjunctivitis, Bacterial +](#)

[Hordeolum](#)

[Keratoconjunctivitis, Infectious](#)

[Tuberculosis, Ocular](#)

[Uveitis, Suppurative +](#)

[Fournier Gangrene](#)

##### Gram-Negative Bacterial Infections

[Aliivibrio Infections](#)

[Anaplasmataceae Infections +](#)

[Anaplasmosis](#)

[Bacteroidaceae Infections +](#)

[Bartonellaceae Infections +](#)

[Bordetella Infections +](#)

[Brucellosis +](#)

[Burkholderia Infections +](#)

[Campylobacter Infections](#)

[Chlamydiaceae Infections +](#)

[Cytophagaceae Infections](#)

[Desulfovibrionaceae Infections](#)

[Ehrlichiosis +](#)

[Enterobacteriaceae Infections](#) + [ESCHERICHIA COLI](#)

[Flavobacteriaceae Infections](#)

[Foot Rot](#)

[Fusobacteriaceae Infections](#) +

[Helicobacter Infections](#)

[Legionellosis](#) +

[Lyme Disease](#) +

[Moraxellaceae Infections](#) +

[Mycoplasmatales Infections](#) +

[Neisseriaceae Infections](#) + [NEISSERIA MENINGITIDIS](#)

[Pasteurellaceae Infections](#) +

[Piscirickettsiaceae Infections](#)

[Pseudomonas Infections](#)

[Q Fever](#)

[Rat-Bite Fever](#)

[Rickettsiaceae Infections](#) +

[Spirochaetales Infections](#) +

[Treponemal Infections](#) +

[Tularemia](#)

[Vibrio Infections](#) +

[Gram-Positive Bacterial Infections](#)

[Actinomycetales Infections](#) +

[Bacillaceae Infections](#) +

[Bifidobacteriales Infections](#)

[Clostridium Infections](#) +

[Erysipelothrix Infections](#) +

[Listeriosis](#) +

[Staphylococcal Infections](#) +

[Streptococcal Infections](#) +

[Pneumonia, Bacterial](#)

[Chlamydial Pneumonia](#)

[Pneumonia of Calves, Enzootic](#)

[Pneumonia of Swine, Mycoplasmal](#)

[Pneumonia, Mycoplasma](#)

[Pneumonia, Pneumococcal](#)

[Pneumonia, Staphylococcal](#)

[Sexually Transmitted Diseases, Bacterial](#)

[Chancroid](#)

[Chlamydia Infections](#) +[Gonorrhoea](#)[Granuloma Inguinale](#)[Syphilis](#)[Skin Diseases, Bacterial](#)[Actinomycosis, Cervicofacial](#)[Angiomatosis, Bacillary](#)[Digital Dermatitis](#)[Ecthyma](#)[Erysipelas](#)[Erythema Chronicum Migrans](#)[Erythrasma](#)[Granuloma Inguinale](#)[Hidradenitis Suppurativa](#)[Mycetoma](#)[Pinta](#)[Rhinoscleroma](#)[Staphylococcal Skin Infections](#) +[Syphilis, Cutaneous](#)[Tuberculosis, Cutaneous](#) +[Yaws](#)[Vaginosis, Bacterial](#)

Erial

Search: ((((((bacterial meningitis) OR (enterobacteriaceae infections)) OR (neisseriaceae infections)) OR (streptococcal infections)) OR ("Bacterial Infections"[Mesh])) AND (Fever)) AND (("COVID-19"[Mesh]) OR "SARS-CoV-2"[Mesh]) Filters: **Child: birth-18 years, from 2020 - 2022** Sort by: **First Author**

((("meningitis, bacterial"[MeSH Terms] OR ("meningitis"[All Fields] AND "bacterial"[All Fields]) OR "bacterial meningitis"[All Fields] OR ("bacterial"[All Fields] AND "meningitis"[All Fields]) OR ("enterobacteriaceae infections"[MeSH Terms] OR ("enterobacteriaceae"[All Fields] AND "infections"[All Fields]) OR "enterobacteriaceae infections"[All Fields]) OR ("neisseriaceae infections"[MeSH Terms] OR ("neisseriaceae"[All Fields] AND "infections"[All Fields]) OR "neisseriaceae

[33](#)

infections"[All Fields]) OR ("streptococcal infections"[MeSH Terms] OR ("streptococcal"[All Fields] AND "infections"[All Fields]) OR "streptococcal infections"[All Fields]) OR "Bacterial Infections"[MeSH Terms]) AND ("fever"[MeSH Terms] OR "fever"[All Fields] OR "fevers"[All Fields]) AND ("COVID-19"[MeSH Terms] OR "SARS-CoV-2"[MeSH Terms])) AND ((allchild[Filter]) AND (2020:2022[pdat]))

### Translations

**bacterial meningitis:** "meningitis, bacterial"[MeSH Terms] OR ("meningitis"[All Fields] AND "bacterial"[All Fields]) OR "bacterial meningitis"[All Fields] OR ("bacterial"[All Fields] AND "meningitis"[All Fields])

**enterobacteriaceae infections:** "enterobacteriaceae infections"[MeSH Terms] OR ("enterobacteriaceae"[All Fields] AND "infections"[All Fields]) OR "enterobacteriaceae infections"[All Fields]

**neisseriaceae infections:** "neisseriaceae infections"[MeSH Terms] OR ("neisseriaceae"[All Fields] AND "infections"[All Fields]) OR "neisseriaceae infections"[All Fields]

**streptococcal infections:** "streptococcal infections"[MeSH Terms] OR ("streptococcal"[All Fields] AND "infections"[All Fields]) OR "streptococcal infections"[All Fields]

**Fever:** "fever"[MeSH Terms] OR "fever"[All Fields] OR "fevers"[All Fields]

Search: ((((((bacterial meningitis) OR (enterobacteriaceae infections)) OR (neisseriaceae infections)) OR (streptococcal infections)) OR ("Bacterial Infections"[Mesh])) AND (Fever)) AND (("COVID-19"[Mesh]) OR "SARS-CoV-2"[Mesh]) Filters: from 2020 - 2022 Sort by: First Author

[108](#)

|                                                                       |                         |
|-----------------------------------------------------------------------|-------------------------|
| Search: (FEVER)                                                       | <a href="#">245,520</a> |
| Search: ("COVID-19"[Mesh]) OR "SARS-CoV-2"[Mesh] Sort by: Most Recent | <a href="#">162,189</a> |
| Search: bacterial meningitis Sort by: First Author                    | <a href="#">36,452</a>  |
| Search: enterobacteriaceae infections Sort by: First Author           | <a href="#">113,693</a> |
| Search: neisseriaceae infections Sort by: First Author                | <a href="#">27,930</a>  |
| Search: streptococcal infections Sort by: First Author                | <a href="#">84,404</a>  |
| Search: "Bacterial Infections"[Mesh] Sort by: Most Recent             | <a href="#">940,131</a> |

## 2. EMBASE

#28 AND ([adolescent]/lim OR [child]/lim OR [infant]/lim OR [newborn]/lim)

29

#28

#1 AND #11

153

#27

#26 AND ([adolescent]/lim OR [child]/lim OR [infant]/lim OR [newborn]/lim)

320

#26

#2 AND #11

1,819

#25

|                                                                            |            |
|----------------------------------------------------------------------------|------------|
| #24 AND ([adolescent]/lim OR [child]/lim OR [infant]/lim OR [newborn]/lim) | 10         |
|                                                                            | <b>#24</b> |
| #3 AND #11                                                                 | 46         |
|                                                                            | <b>#23</b> |
| #22 AND ([adolescent]/lim OR [child]/lim OR [infant]/lim OR [newborn]/lim) | 35         |
|                                                                            | <b>#22</b> |
| #4 AND #11                                                                 | 216        |
|                                                                            | <b>#21</b> |
| #20 AND ([adolescent]/lim OR [child]/lim OR [infant]/lim)                  | 21         |
|                                                                            | <b>#20</b> |
| #5 AND #11                                                                 | 101        |
|                                                                            | <b>#19</b> |
| #18 AND ([adolescent]/lim OR [child]/lim OR [newborn]/lim)                 | 8          |
|                                                                            | <b>#18</b> |
| #6 AND #11                                                                 | 45         |
|                                                                            | <b>#17</b> |
| #16 AND ([adolescent]/lim OR [child]/lim)                                  | 4          |
|                                                                            | <b>#16</b> |
| #7 AND #11                                                                 | 18         |
|                                                                            | <b>#15</b> |
| #14 AND ([adolescent]/lim OR [child]/lim)                                  | 4          |
|                                                                            | <b>#14</b> |
| #7 AND #11                                                                 | 18         |
|                                                                            | <b>#13</b> |
| #12 AND ([adolescent]/lim OR [child]/lim OR [newborn]/lim)                 | 41         |
|                                                                            | <b>#12</b> |
| #8 AND #11                                                                 | 138        |
|                                                                            | <b>#11</b> |

|                                                                      |            |
|----------------------------------------------------------------------|------------|
| #9 AND #10                                                           | 20,478     |
|                                                                      | <b>#10</b> |
| 'fever'/exp OR fever                                                 | 483,562    |
|                                                                      | <b>#9</b>  |
| 'coronavirus disease 2019'/exp OR 'coronavirus disease 2019'         | 224,576    |
|                                                                      | <b>#8</b>  |
| 'streptococcus infection'/exp OR 'streptococcus infection'           | 67,283     |
|                                                                      | <b>#7</b>  |
| 'neisseria meningitidis'/exp OR 'neisseria meningitidis'             | 17,989     |
|                                                                      | <b>#6</b>  |
| 'neisseriaceae infection'/exp OR 'neisseriaceae infection'           | 37,406     |
|                                                                      | <b>#5</b>  |
| 'escherichia coli'/exp OR 'escherichia coli'                         | 496,346    |
|                                                                      | <b>#4</b>  |
| 'enterobacteriaceae infection'/exp OR 'enterobacteriaceae infection' | 83,699     |
|                                                                      | <b>#3</b>  |
| 'bacterial meningitis'/exp OR 'bacterial meningitis'                 | 35,502     |
|                                                                      | <b>#2</b>  |
| 'bacterial infection'/exp OR 'bacterial infection'                   | 1,116,826  |
|                                                                      | <b>#1</b>  |
| 'bacteremia'/exp OR bacteremia                                       | 67,659     |

### 3. Web Of Science

Búsqueda en todas las bases de datos de la WOS:

Results for:

covid-19 (Topic) AND fever (Topic) AND "bacterial infections" (Topic) and Child or Infant or Adolescent or Child Preschool (MeSH Headings)

43 results from All Databases for:

13 results from MEDLINE® for:

Results for All Child: 0-18 years (Age Group) AND covid-19 (Topic) AND fever (Topic) AND "bacterial infections" (Topic)

Web of Science® Search Marked List History Alerts

SUSANA VILLAR

#### 4. SCOPUS

( TITLE-ABS-  
KEY ( **bacterial AND infections** ) ) AND ( ( ( **covid** ) ) AND ( **child\*** ) ) A  
ND ( **fever** ) AND ( LIMIT-TO ( PUBYEAR , 2022 ) OR LIMIT-  
TO ( PUBYEAR , 2021 ) OR LIMIT-  
TO ( PUBYEAR , 2020 ) ) AND ( LIMIT-  
TO ( LANGUAGE , "English" ) OR LIMIT-  
TO ( LANGUAGE , "French" ) OR LIMIT-  
TO ( LANGUAGE , "Spanish" ) ) AND ( LIMIT-  
TO ( EXACTKEYWORD , "Coronavirus Disease 2019" ) OR LIMIT-  
TO ( EXACTKEYWORD , "COVID-19" ) OR LIMIT-  
TO ( EXACTKEYWORD , "Fever" ) OR LIMIT-  
TO ( EXACTKEYWORD , "SARS-CoV-2" ) OR LIMIT-  
TO ( EXACTKEYWORD , "Bacterial Infection" ) OR LIMIT-  
TO ( EXACTKEYWORD , "Child" ) OR LIMIT-  
TO ( EXACTKEYWORD , "Adolescent" ) OR LIMIT-  
TO ( EXACTKEYWORD , "Coronavirus Infection" ) OR LIMIT-  
TO ( EXACTKEYWORD , "Infant" ) OR LIMIT-  
TO ( EXACTKEYWORD , "Coronavirus Infections" ) OR LIMIT-  
TO ( EXACTKEYWORD , "Pneumonia" ) OR LIMIT-  
TO ( EXACTKEYWORD , "Anti-Bacterial Agents" ) OR LIMIT-  
TO ( EXACTKEYWORD , "Preschool Child" ) OR LIMIT-  
TO ( EXACTKEYWORD , "Newborn" ) OR LIMIT-  
TO ( EXACTKEYWORD , "Bacterial Infections" ) OR LIMIT-  
TO ( EXACTKEYWORD , "Child, Preschool" ) OR LIMIT-  
TO ( EXACTKEYWORD , "Coronavirus" ) )

#### 5. Cochrane Library

- **Topics:**

- [Salud infantil](#)

- [Enfermedad infecciosa](#)



## COCHRANE COVID-19 STUDY

BACTERIAL INFECTIONS AND INFANT OR CHILD\* OR ADOLESCENT OR NEONATAL..... 129  
RESULTADOS

### 6. Clinicaltrials.gov

The screenshot shows the ClinicalTrials.gov search results page. At the top, it displays the NIH logo and the text "U.S. National Library of Medicine". Below this is the "ClinicalTrials.gov" logo. A navigation bar contains links for "Find Studies", "About Studies", "Submit Studies", "Resources", "About Site", and "PRS Login". The search results section shows "14 Studies found for: COVID-19 AND 'Bacterial Infections' | Child". Below this, it says "Also searched for COVID. See Search Details". A filter box shows "Applied Filters: Child (birth-17)". On the right, a box titled "Your search included: COVID-19" provides links to learn more about clinical studies related to COVID-19, including "ClinicalTrials.gov: Federally-funded clinical studies related to COVID-19", "WHO Trial Registry Network: COVID-19 studies from the ICTRP database", "NIH: COVID-19 Treatment Guidelines", and "ClinicalTrials.gov: Views of Listed COVID-19 Studies (Beta)".

NIH U.S. National Library of Medicine  
**ClinicalTrials.gov**  
Find Studies ▾ About Studies ▾ Submit Studies ▾ Resources ▾ About Site ▾ PRS Login

Home > Search Results

Modify Search Start Over

14 Studies found for: **COVID-19 AND "Bacterial Infections"** | Child  
Also searched for **COVID**. [See Search Details](#)

Applied Filters:  **Child (birth-17)**

Your search included: **COVID-19**

Learn more about clinical studies related to COVID-19:

- **ClinicalTrials.gov**: [Federally-funded clinical studies related to COVID-19](#)
- **WHO Trial Registry Network**: [COVID-19 studies from the ICTRP database](#)
- **NIH**: [COVID-19 Treatment Guidelines](#)
- **ClinicalTrials.gov**: [Views of Listed COVID-19 Studies \(Beta\)](#)

## Terms and Synonyms Searched:

| Terms                                           | Search Results* | Entire Database** |
|-------------------------------------------------|-----------------|-------------------|
| Synonyms                                        |                 |                   |
| <b>COVID-19</b>                                 | 14 studies      | 7,999 studies     |
| COVID                                           | 14 studies      | 7,944 studies     |
| Novel Coronavirus                               | 1 studies       | 163 studies       |
| SARS-CoV-2                                      | 1 studies       | 2,619 studies     |
| 2019-nCoV                                       | --              | 62 studies        |
| Coronavirus Disease 19                          | --              | 52 studies        |
| Coronavirus disease 2019                        | --              | 357 studies       |
| SARS Coronavirus 2                              | --              | 20 studies        |
| Severe Acute Respiratory Syndrome Coronavirus 2 | --              | 244 studies       |
| Wuhan Coronavirus                               | --              | 1 studies         |
| <b>Bacterial Infections</b>                     | 14 studies      | 6,619 studies     |
| bacteria caused diseases                        | --              | 1 studies         |
| bacterial disease                               | --              | 11 studies        |

### Supplemental File 1. Detailed search strategy for systematic review
